# Supplementary material for: Noninvasive Ventilation in Acute Cardiogenic Pulmonary Edema
Source: Atypon-hosted journal article supplement (doi:10.1056/nejmoa0707992), 2008-07-09

## Supplementary Appendix

This appendix has been provided by the authors to give readers additional information about their work.

Supplement to: Gray A, Goodacre S, Newby DE, Masson M, Sampson F, Nicholl J. Noninvasive ventilation in acute cardiogenic pulmonary edema. *N Engl J Med* 2008;359:142-51.

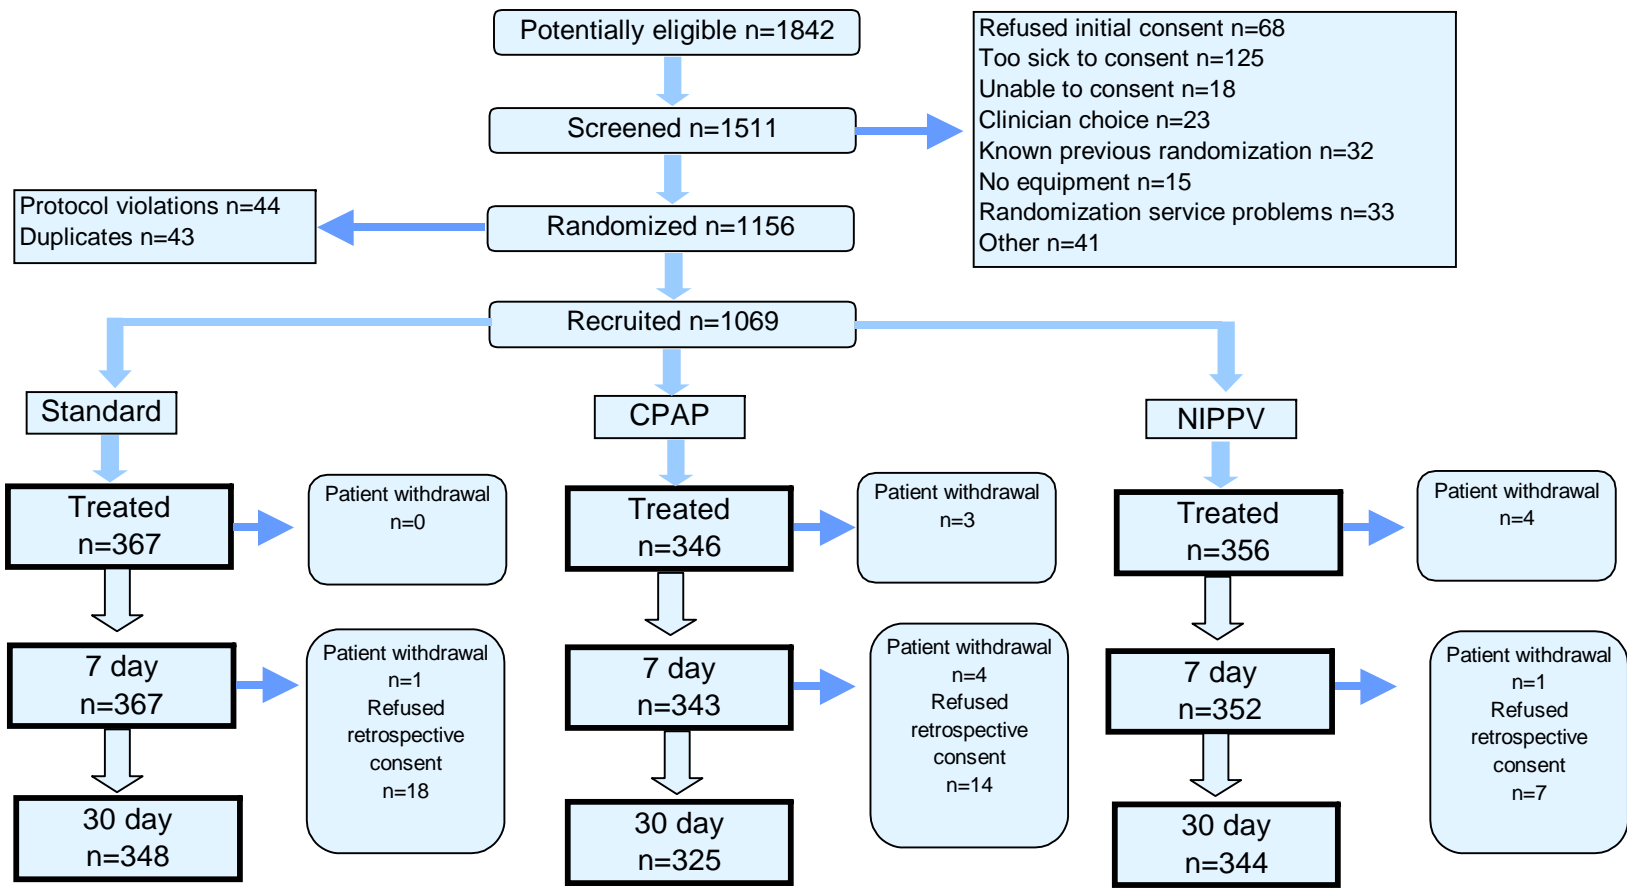

Supplement: nejm_gray_142sa1.pdf [file nejm_gray_142sa1.pdf]
